# Supplementary material
Source: bioRxiv or medRxiv preprint supplement (https://www.medrxiv.org/content/medrxiv/early/2021/11/11/2021.11.06.21265920/DC2/embed/media-2.pdf)

# Other cataract 10:113725526:T:C CASP7

hom p-value:  $4e-23$ , het p-value: 0.012 (cph model)

Strata genotype=het genotype=hom genotype=wt

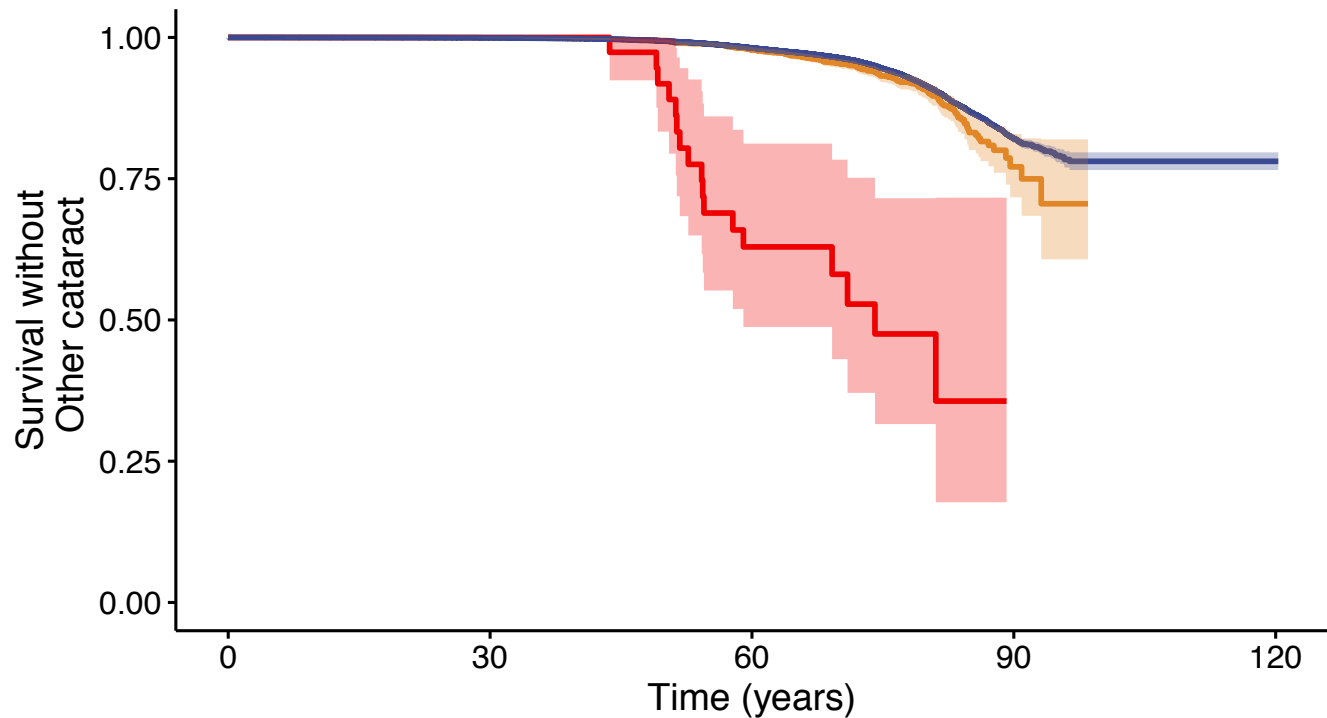

# Conductive and sensorineural hearing loss

s 10:126459169:G:A C10orf90

hom p-value:  $9.2e-27$ , het p-value: 0.38 (cph model)

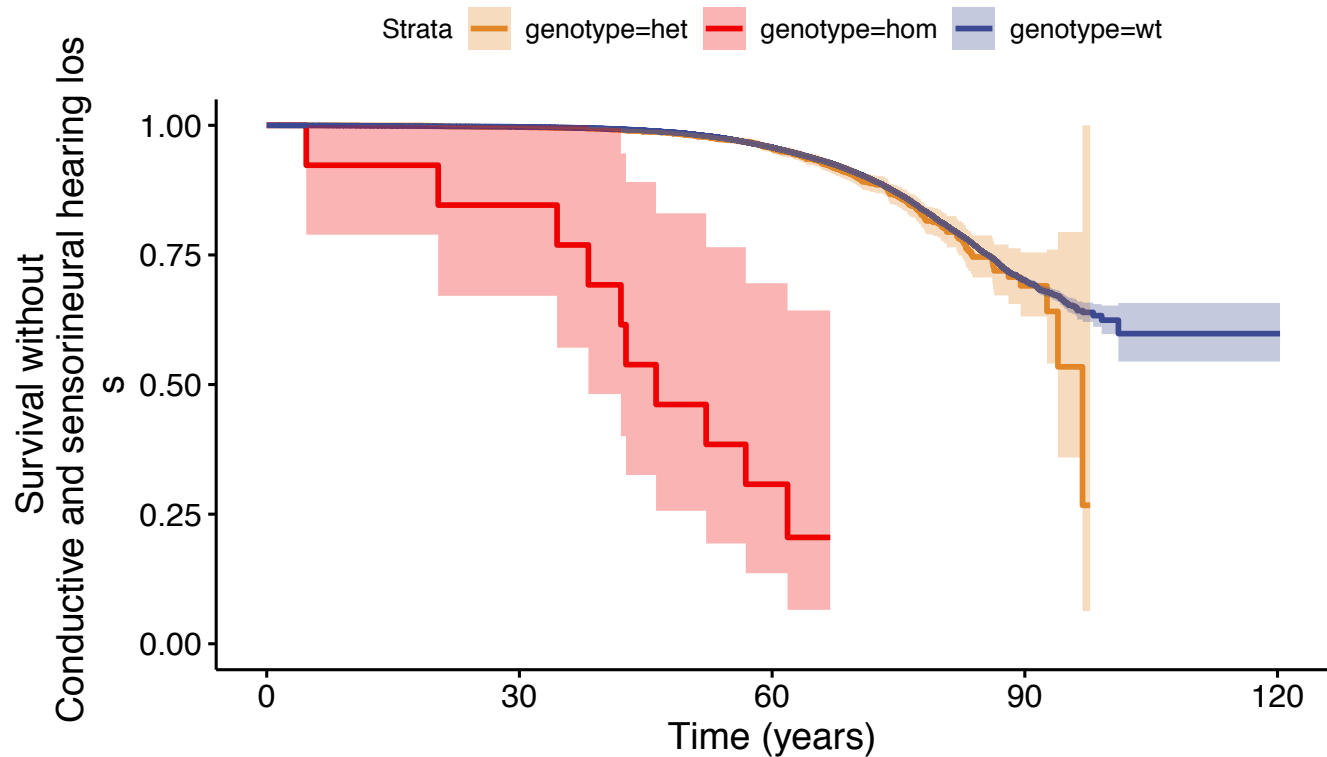

Type 1 diabetes, wide definition, subgro  
up 1 11:2159830:T:G INS

hom p-value: 1.6e-09, het p-value: 0.21 (cph model)

Strata genotype=het genotype=hom genotype=wt

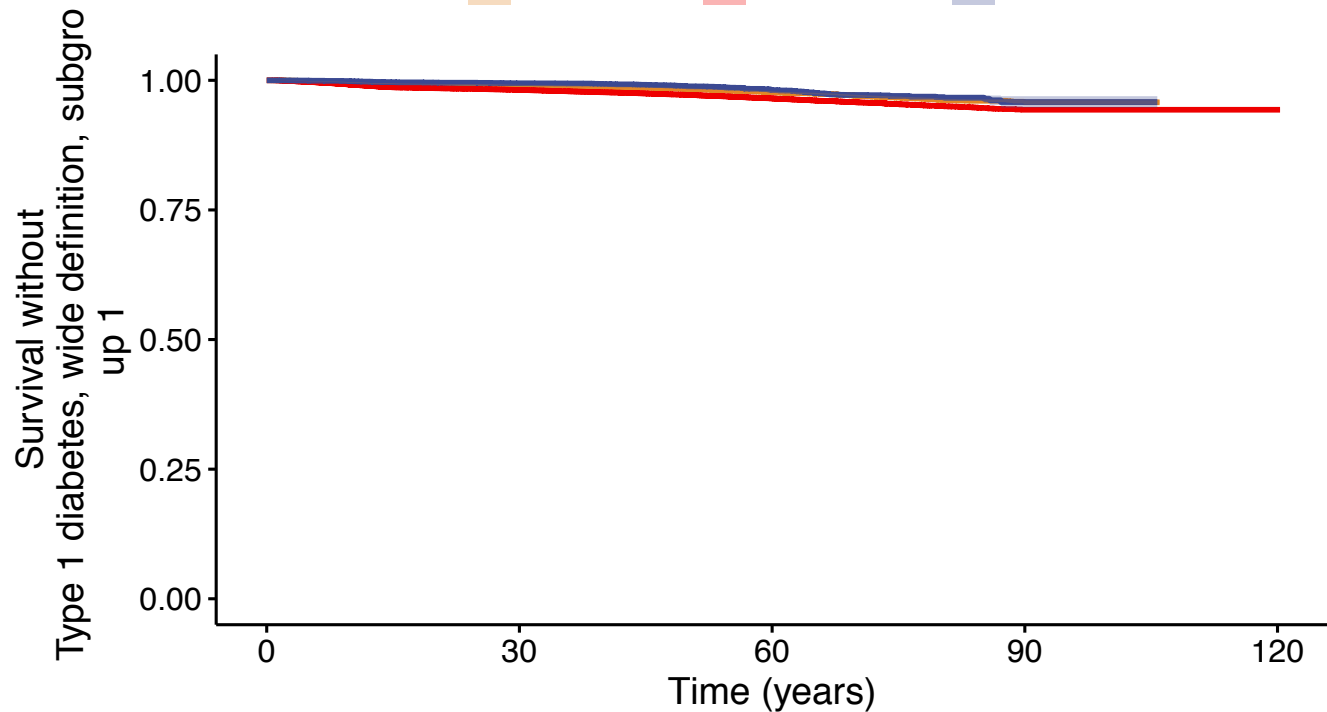

Cardiac murmurs and other cardiac sounds 12:21334610:A:G  
hom p-value: 1.6e-08, het p-value: 0.45 (cph model)

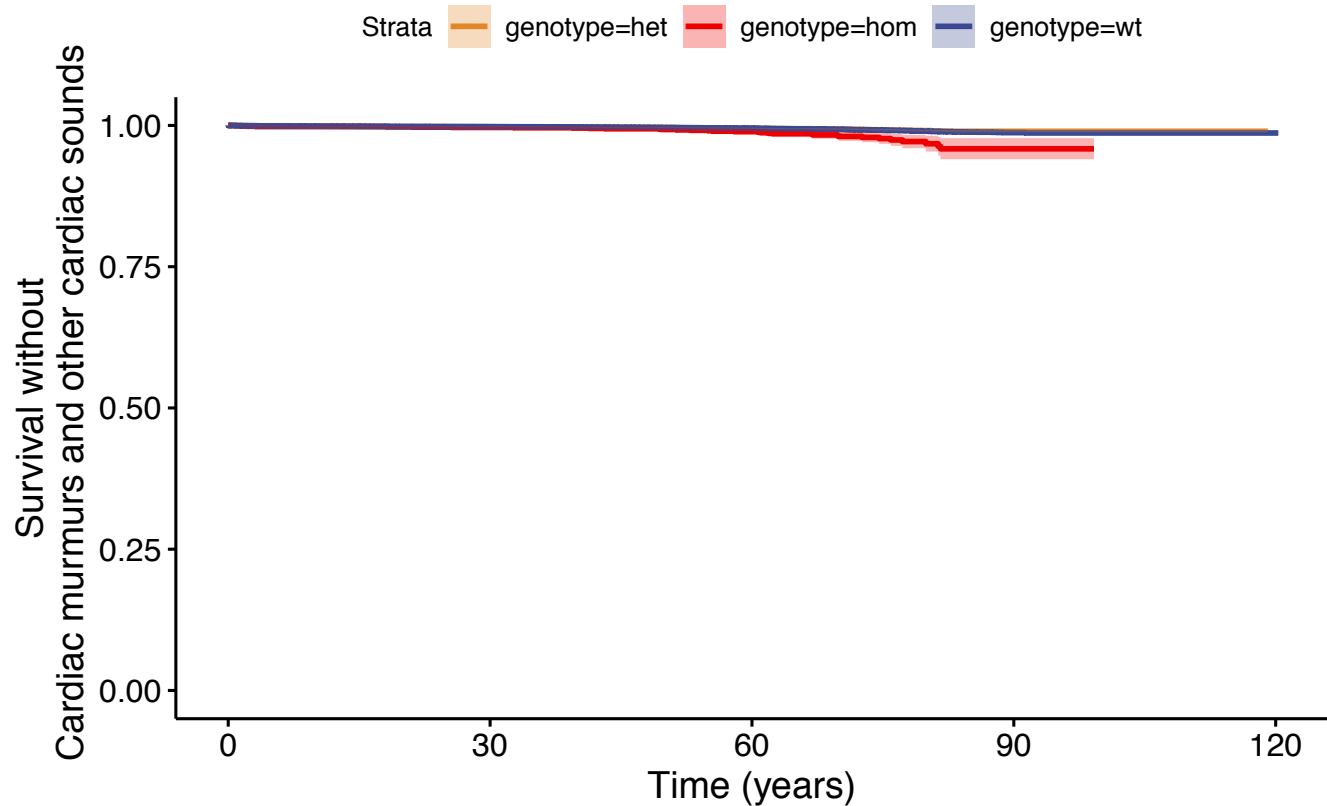

# Sensorineural hearing loss 13:20189546:AC:A GJB2

hom p-value:  $9.3e-44$ , het p-value: 0.28 (cph model)

Strata genotype=het genotype=hom genotype=wt

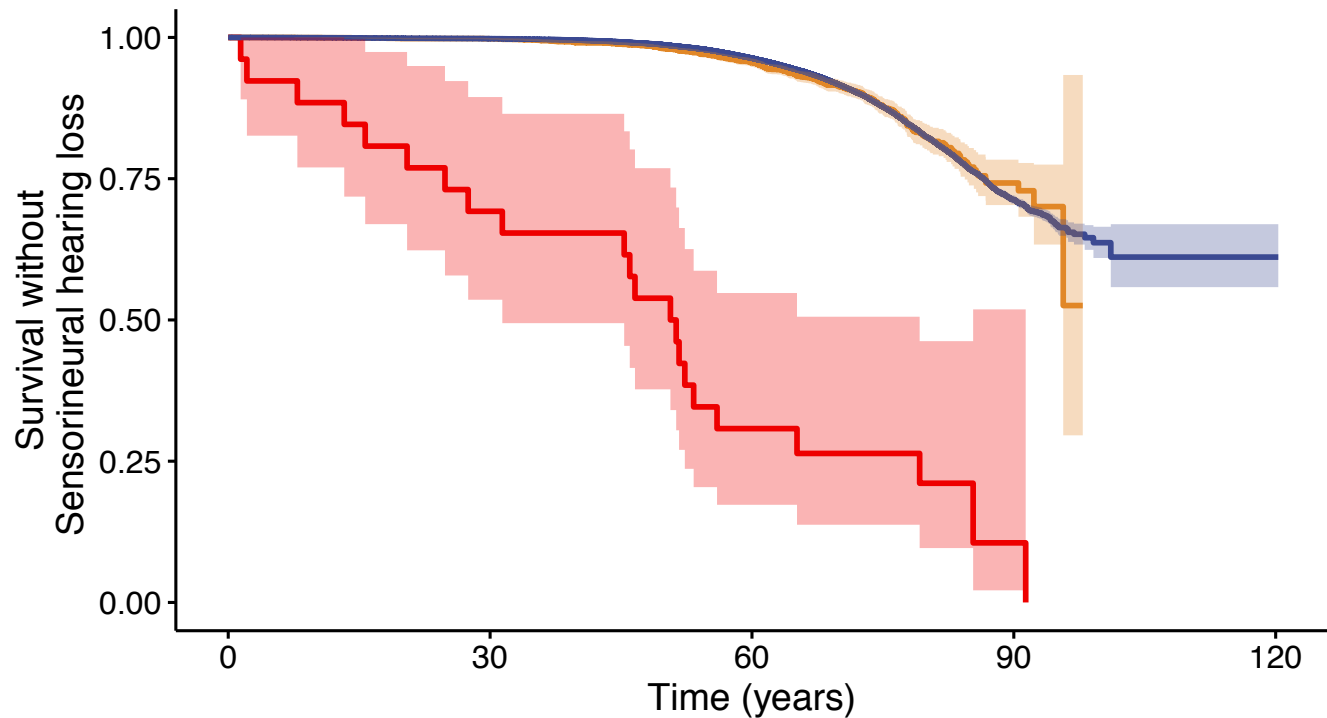

Immunodeficiency with predominantly anti  
body defects 14:105769806:G:A IGHG3  
hom p-value:  $3.9e-05$ , het p-value: 0.6 (cph model)

Strata genotype=het genotype=hom genotype=wt

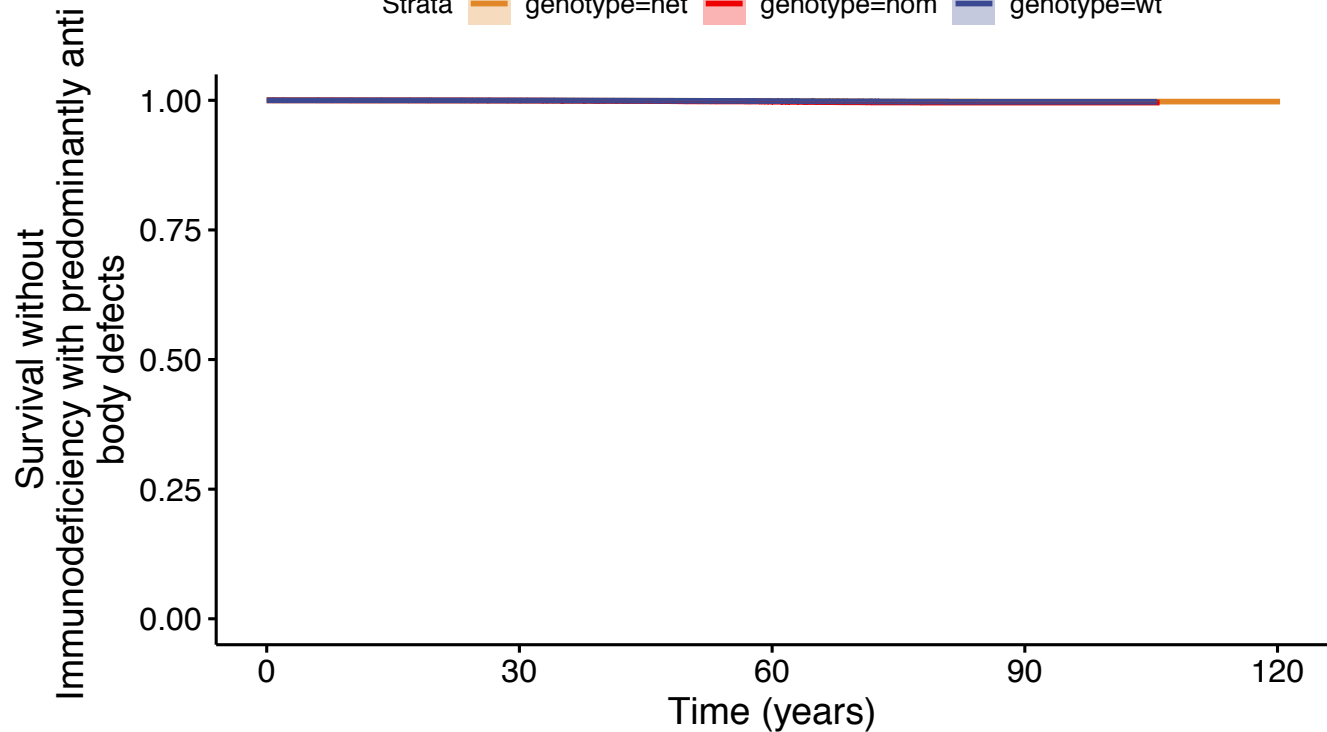

# Emphysema 14:94378610:C:T SERPINA1

hom p-value:  $1.2e-57$ , het p-value: 0.026 (cph model)

Strata genotype=het genotype=hom genotype=wt

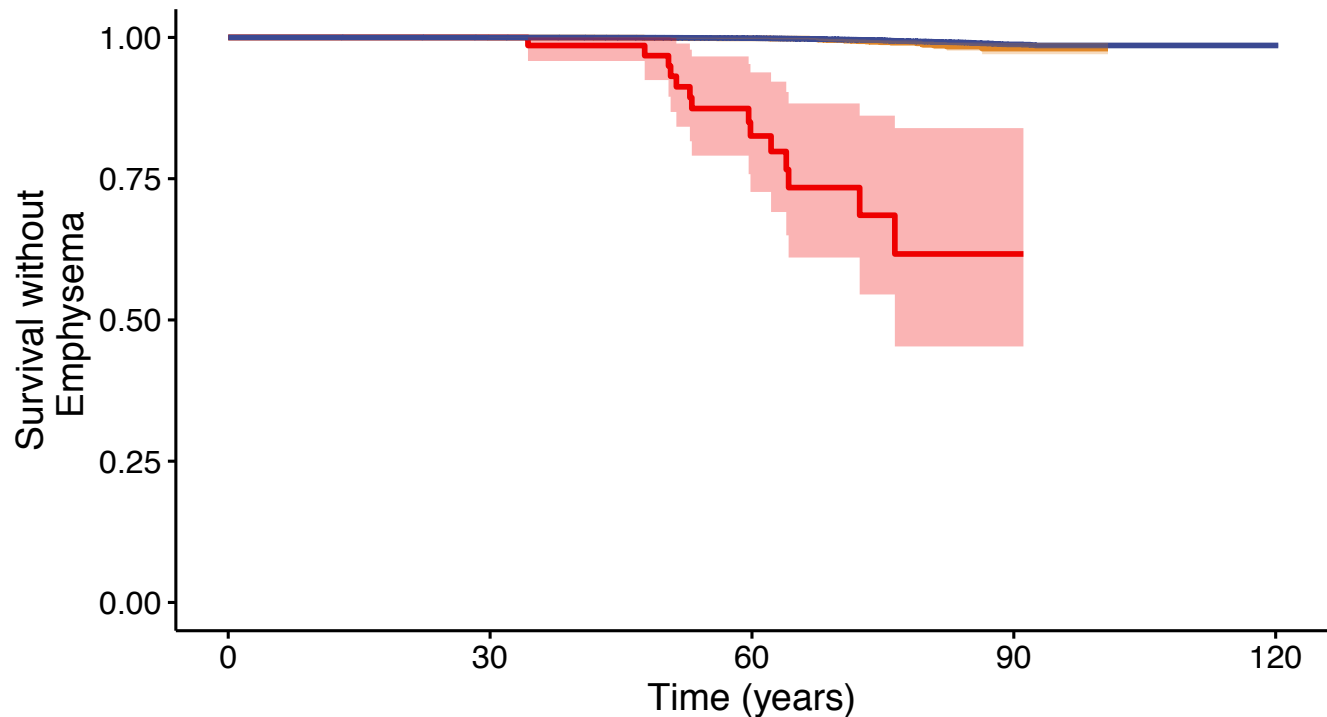

Demyelinating diseases of the central nervous system 15:82988716:T:C C15orf40  
hom p-value:  $2.1 \times 10^{-15}$ , het p-value: 0.32 (cph model)

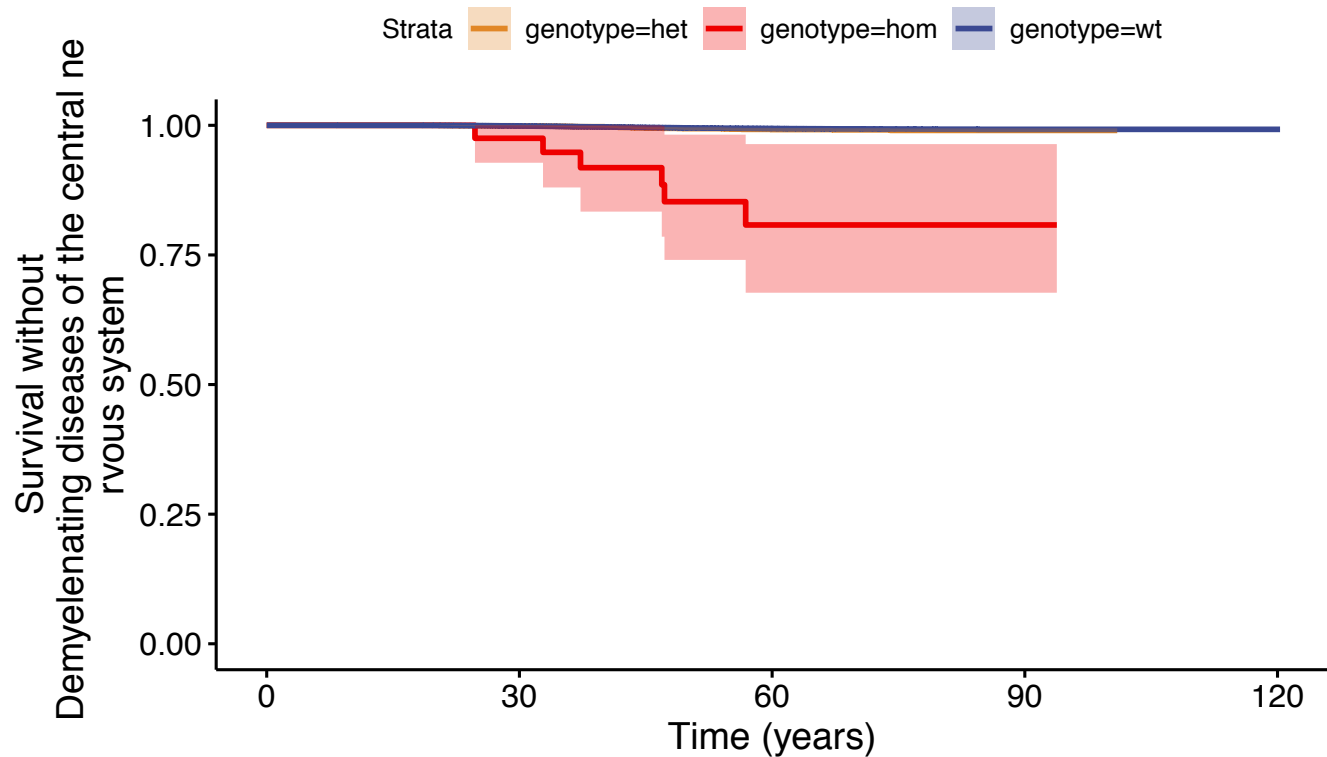

# Nephrotic syndrome 19:35851608:CAG:C NPHS1

hom p-value:  $9.3e-81$ , het p-value: 0.00041 (cph model)

Strata genotype=het genotype=hom genotype=wt

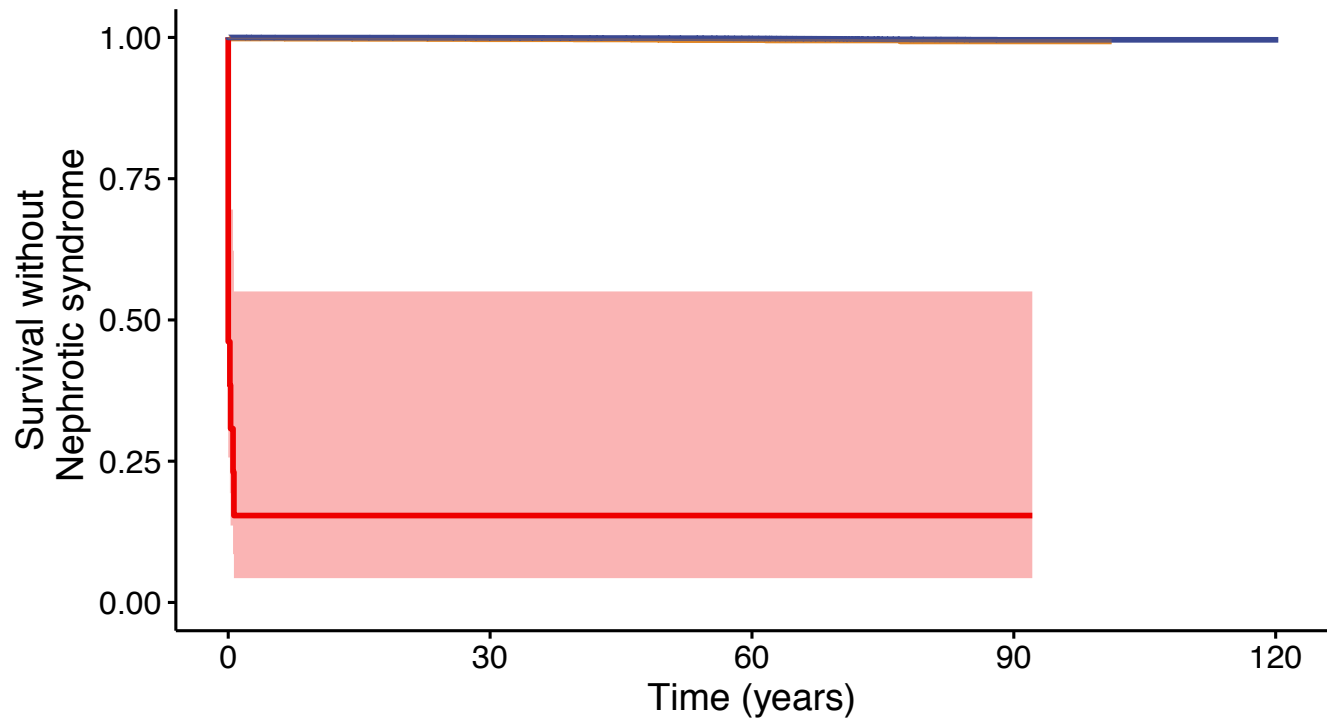

# Intestinal infectious diseases 19:48703417:G:A FUT2

hom p-value:  $2.6e-06$ , het p-value: 0.12 (cph model)

Strata genotype=het genotype=hom genotype=wt

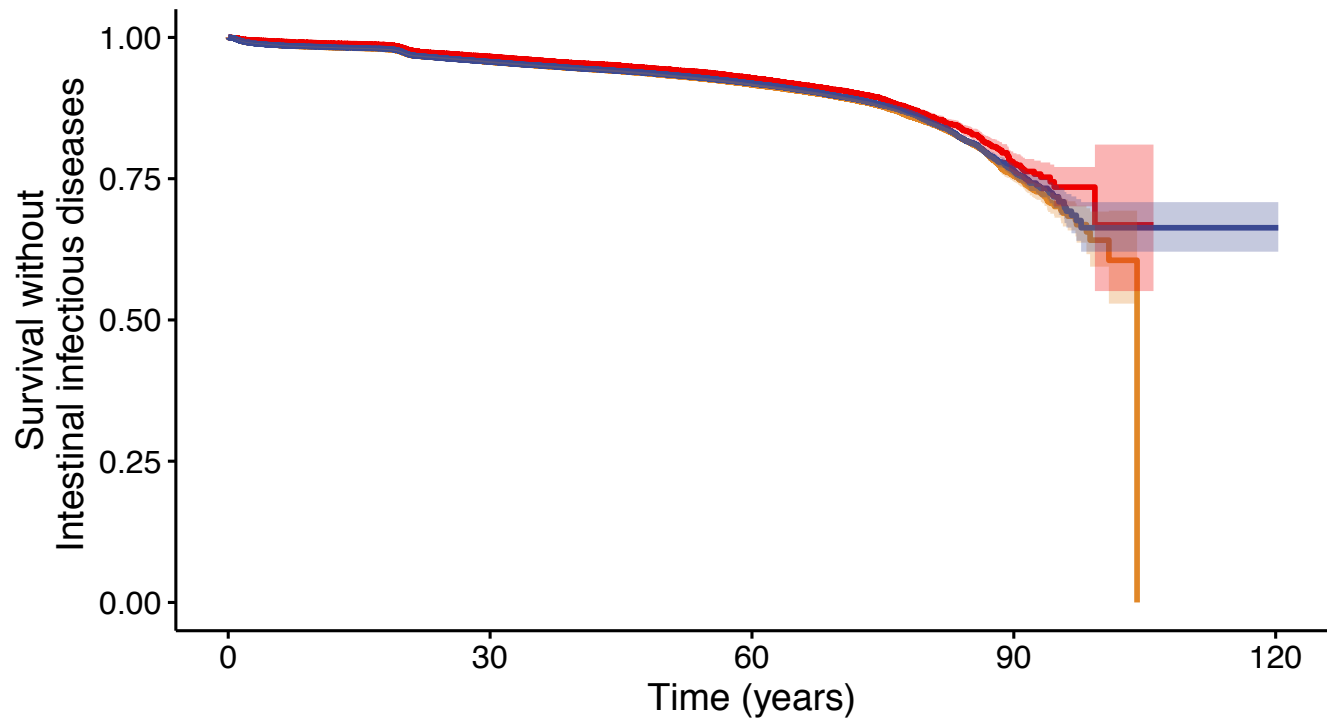

Mild mental retardation 19:53108802:T:C ZNF415  
hom p-value: 5.6e-11, het p-value: 0.78 (cph model)

Strata genotype=het genotype=hom genotype=wt

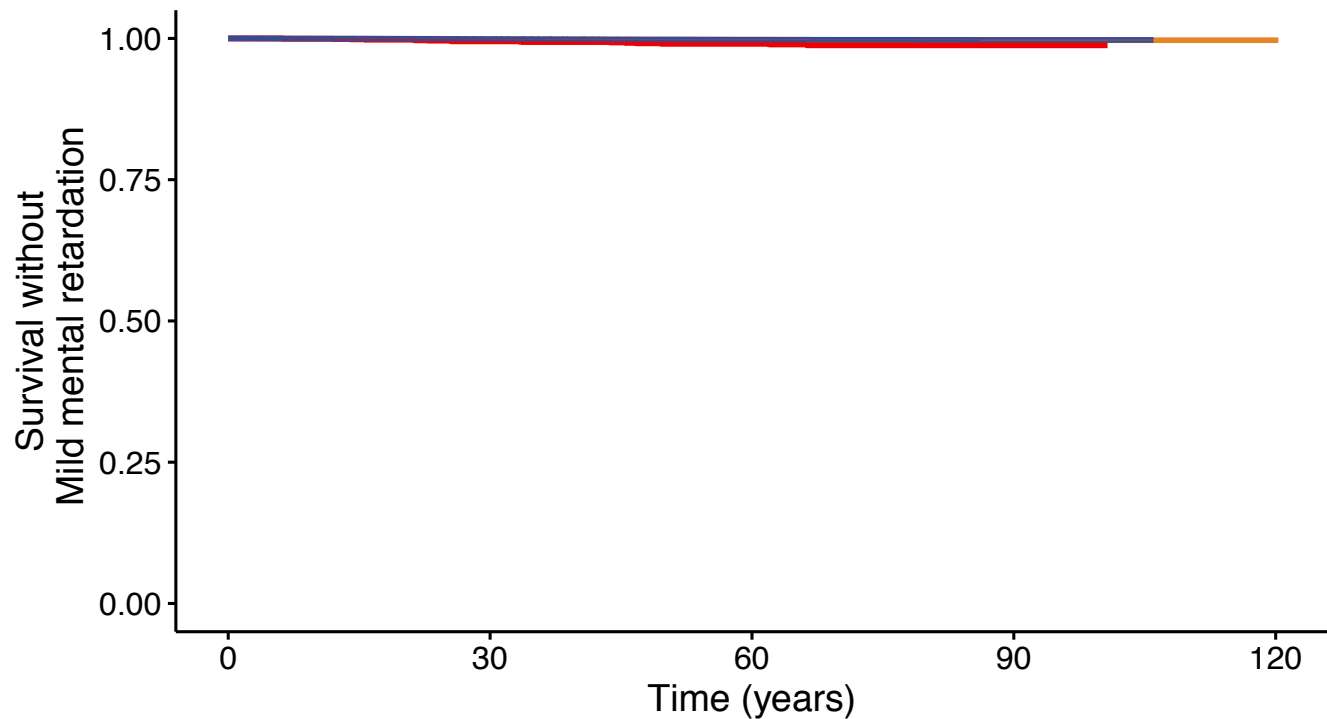

Other disorders of glucose regulation and pancreatic internal secreti 20:57563691:G:A PCK1  
hom p-value:  $3.9e-21$ , het p-value: 0.46 (cph model)

Strata genotype=het genotype=hom genotype=wt

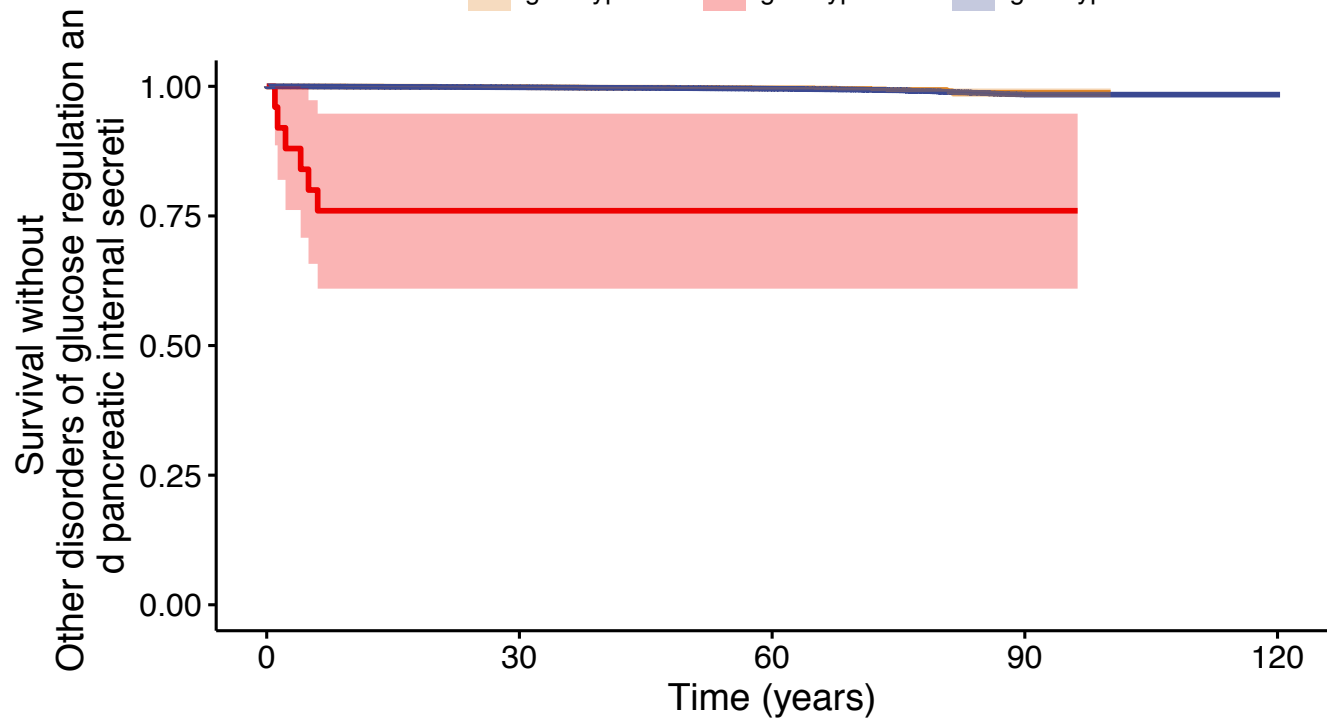

# Hereditary retinal dystrophy 2:181603943:G:C CERKL

hom p-value:  $4e-56$ , het p-value:  $2.6e-05$  (cph model)

Strata genotype=het genotype=hom genotype=wt

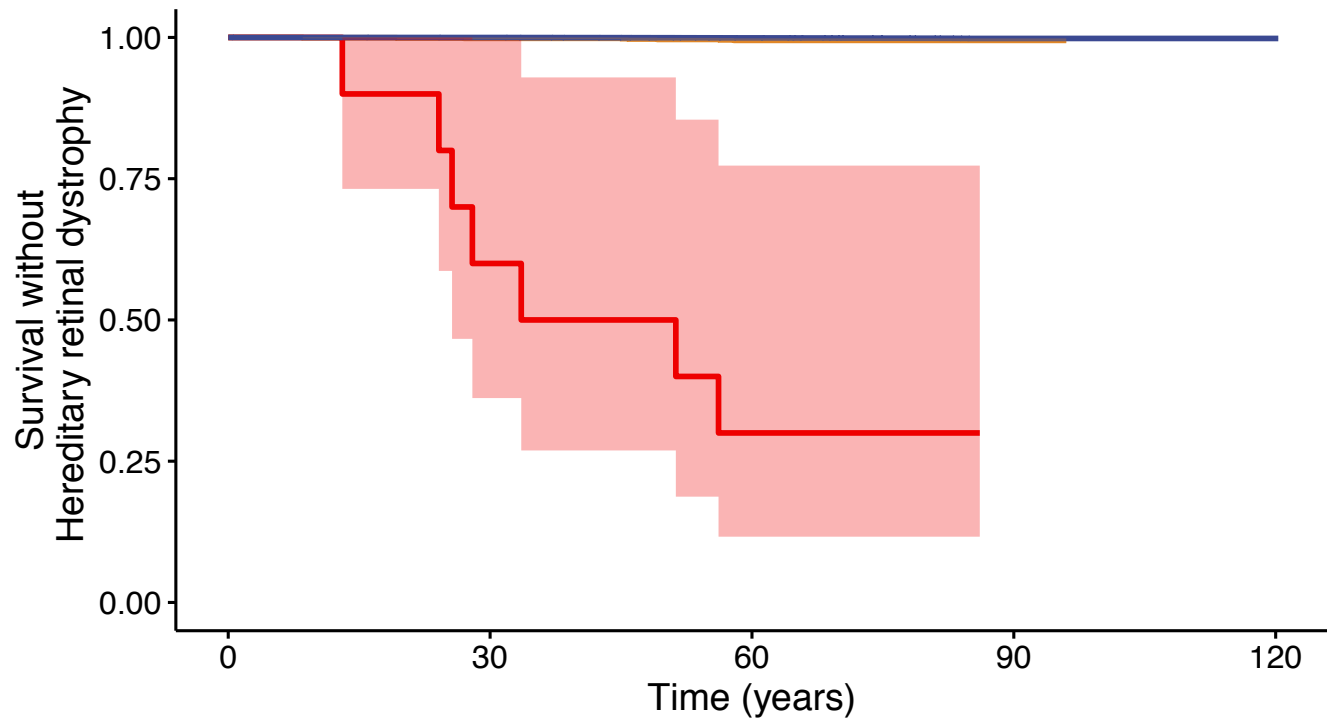

Cholelithiasis, broad definition with ch  
olecystitis 2:233693556:A:C UGT1A6  
hom p-value: 1.3e-09, het p-value: 0.49 (cph model)

Strata genotype=het genotype=hom genotype=wt

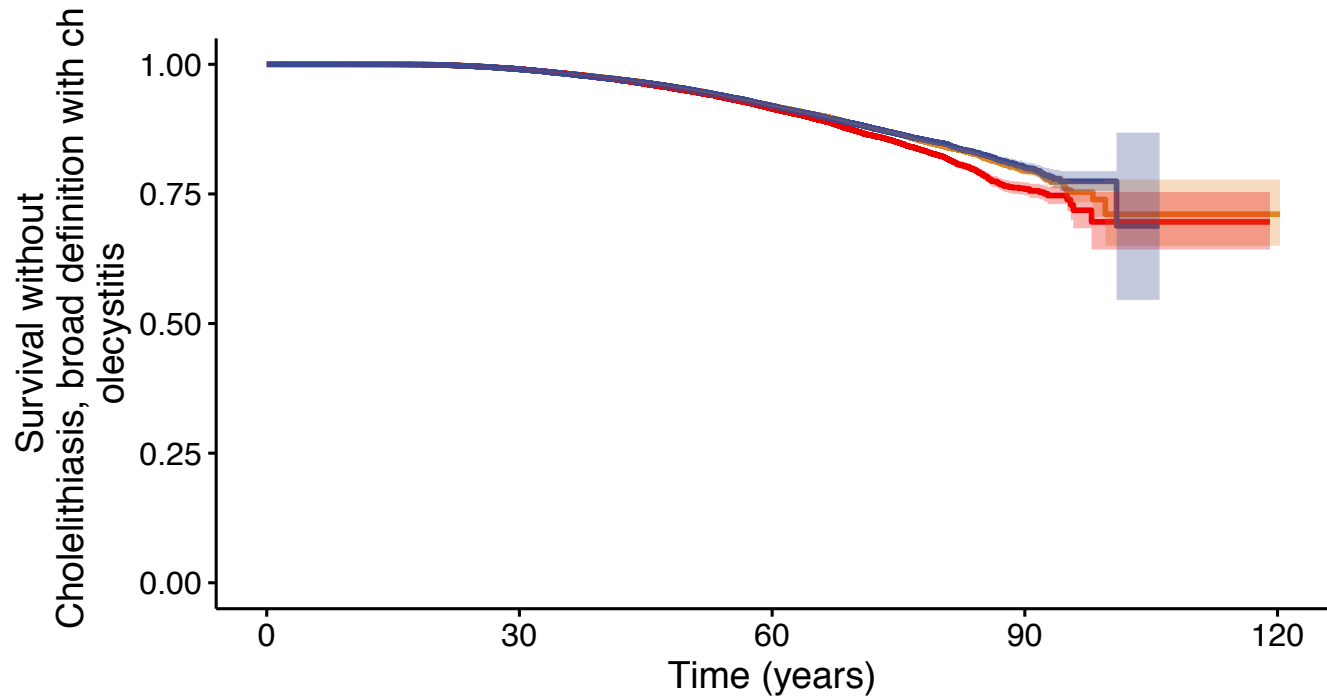

Pain (limb, back, neck, head abdominally

) 2:27037601:G:A TMEM214

hom p-value:  $1.8e-10$ , het p-value: 0.12 (cph model)

Strata genotype=het genotype=hom genotype=wt

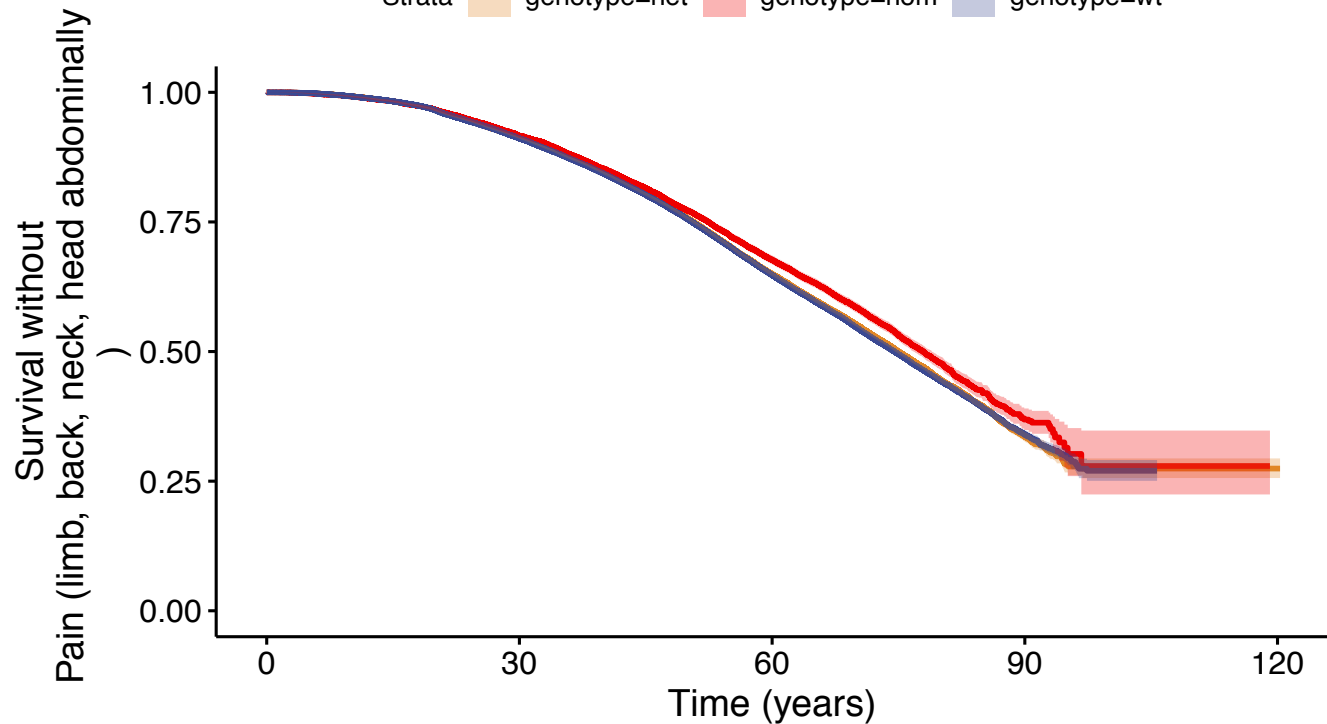

# Hereditary retinal dystrophy 3:150928107:A:C CLRN1

hom p-value:  $6.9e-81$ , het p-value: 0.65 (cph model)

Strata genotype=het genotype=hom genotype=wt

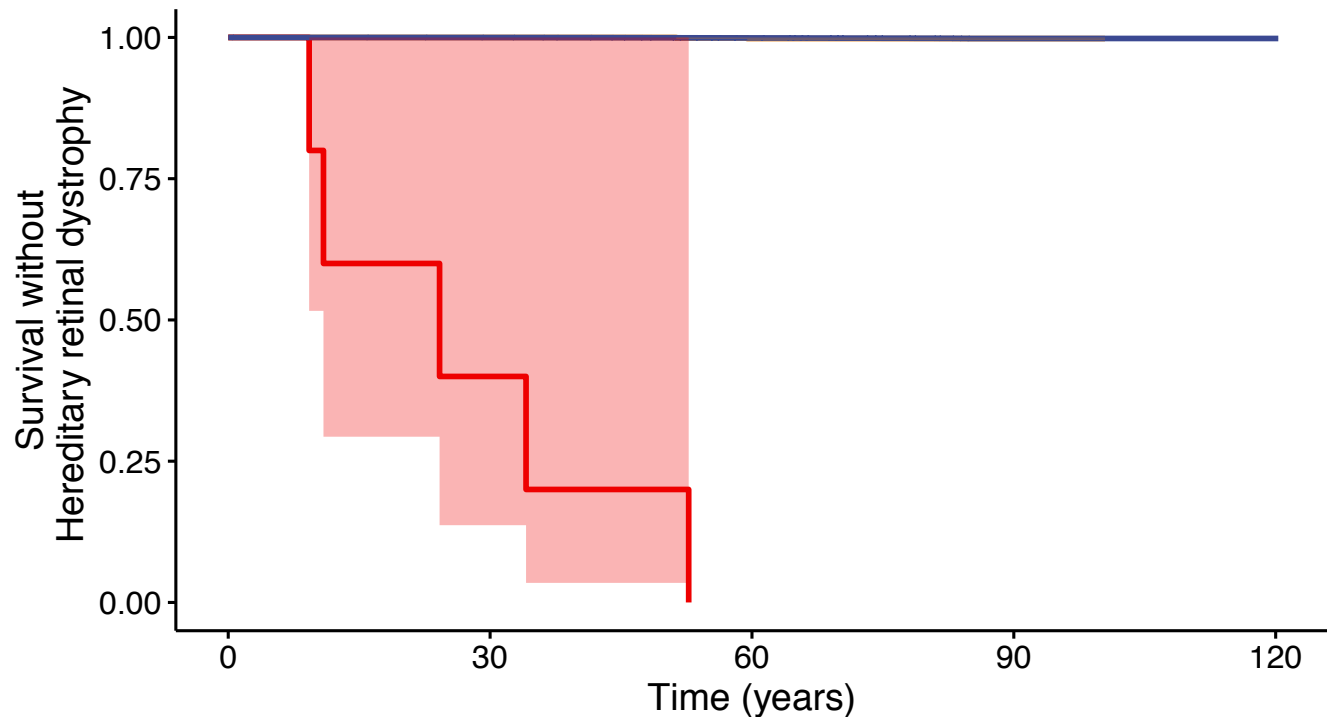

# Hereditary retinal dystrophy 6:63721375:TTCTGCATG:T EYS

hom p-value:  $5.3e-75$ , het p-value: 0.23 (cph model)

Strata genotype=het genotype=hom genotype=wt

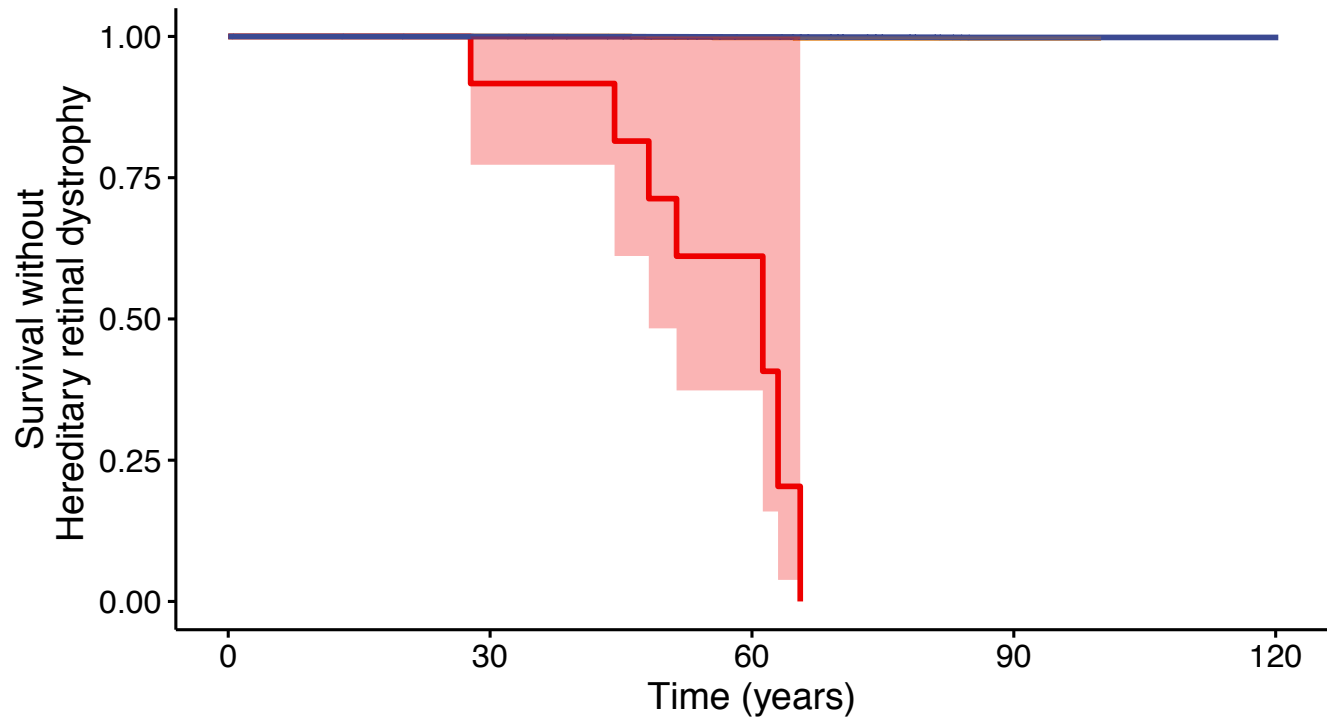

# Diseases of the myoneural junction and muscle 7:143351678:C:T CLCN1

hom p-value:  $5.3e-32$ , het p-value: 0.47 (cph model)

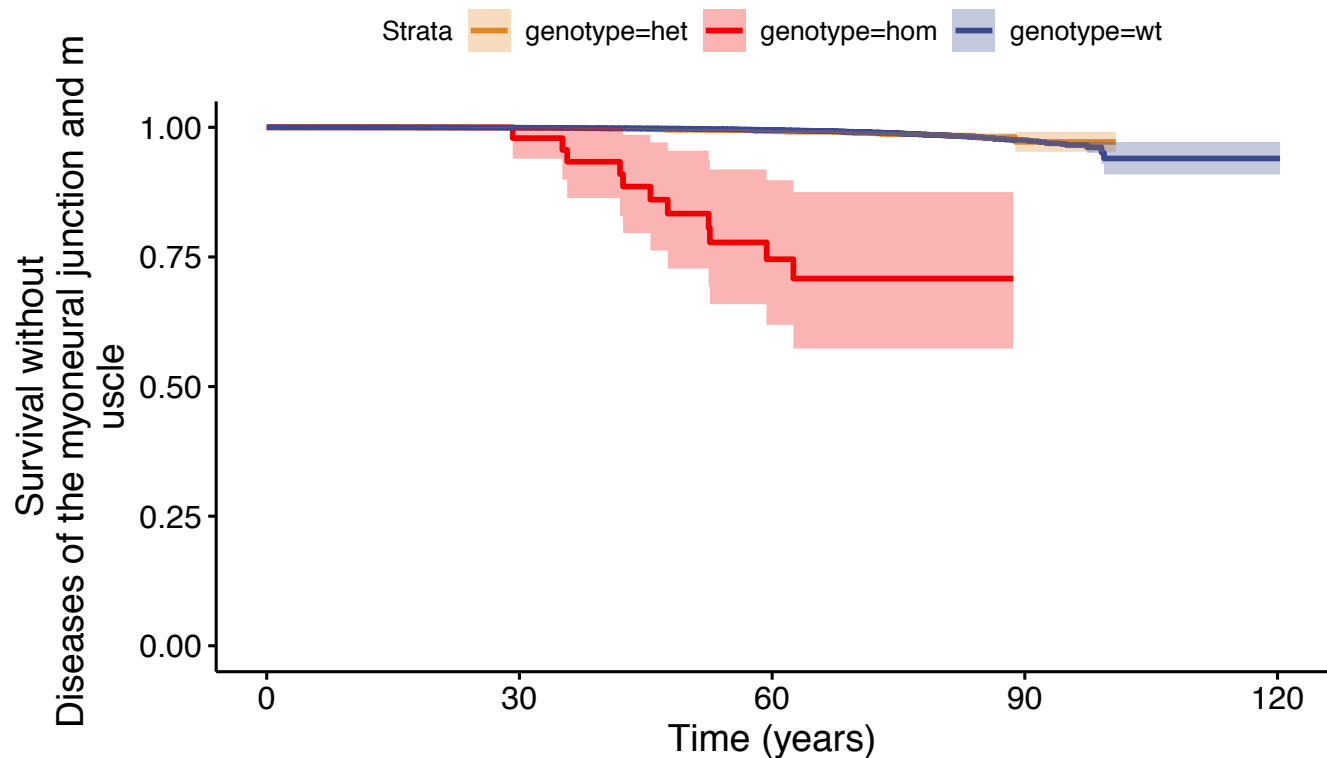

# Female infertility 8:109459837:G:C PKHD1L1

hom p-value:  $3.9e-14$ , het p-value: 0.025 (cph model)

Strata genotype=het genotype=hom genotype=wt

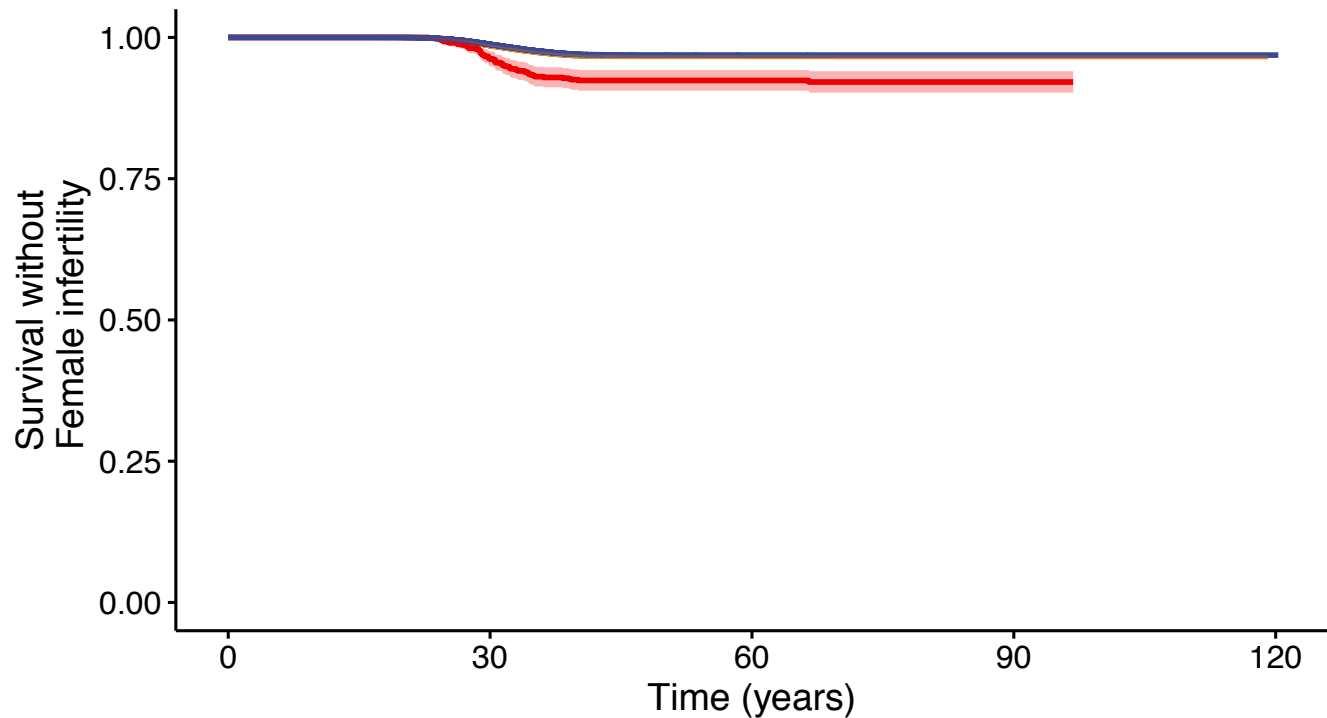

# ILD Co-morbidities, CVD and metabolic diseases 9:132401954:C:A TTF1

hom p-value: 0.0019, het p-value: 0.53 (cph model)

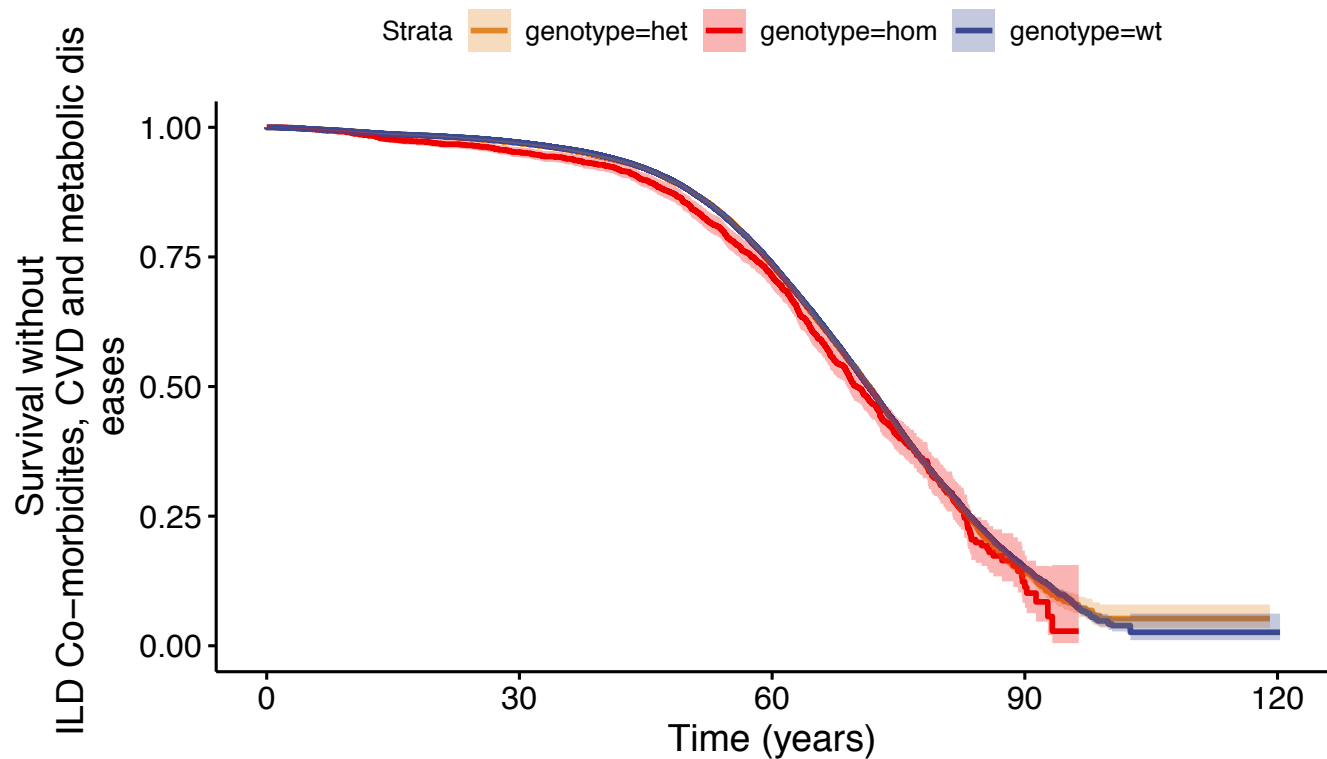

Supplement: Supplementary file [file media-2.pdf]
